# Supplementary material for: Whole‐Body Barometric Plethysmography Characterizes Upper Airway Obstruction in 3 Brachycephalic Breeds of Dogs
Source: PubMed Central journal article supplement — J Vet Intern Med. 2016 May 9;30(3):853–65. doi: 10.1111/jvim.13933 (PMC4913582; doi:10.1111/jvim.13933), 2016-05-09
Supplement: JVIM-30-853-s001.pdf [file JVIM-30-853-s001.pdf]

## Supporting Information 1. Input data for QDA models.

### Model (PFB): general model based on 266 brachycephalic dogs (100 pugs, 100 French bulldogs, and 66 bulldogs).

Prior probabilities (Grade 0, 1, 2, 3): 0.101, 0.327, 0.414, 0.158

#### Parameter means

|         | Te/Ti_m | PEF/PIF_m | PEF/PIF_sd | MV/BW_sd | Te/Ti_sd | MV/BW_m |
|---------|---------|-----------|------------|----------|----------|---------|
| Grade 0 | 1.047   | 0.964     | 0.138      | 21.466   | 0.205    | 194.589 |
| Grade 1 | 1.085   | 0.958     | 0.132      | 23.302   | 0.208    | 196.190 |
| Grade 2 | 1.107   | 1.235     | 0.282      | 33.902   | 0.294    | 210.431 |
| Grade 3 | 1.099   | 1.530     | 0.336      | 38.432   | 0.302    | 240.009 |

#### Covariance matrix, Grade 0

|            | Te/Ti_m | PEF/PIF_m | PEF/PIF_sd | MV/BW_sd | Te/Ti_sd | MV/BW_m  |
|------------|---------|-----------|------------|----------|----------|----------|
| Te/Ti_m    | 0.077   | -0.022    | -0.001     | -0.420   | 0.015    | 2.248    |
| PEF/PIF_m  | -0.022  | 0.020     | 0.004      | 0.904    | -0.001   | 0.349    |
| PEF/PIF_sd | -0.001  | 0.004     | 0.003      | 0.247    | 0.002    | 0.187    |
| MV/BW_sd   | -0.420  | 0.904     | 0.246      | 84.437   | 0.277    | 61.160   |
| Te/Ti_sd   | 0.0154  | -0.001    | 0.002      | 0.277    | 0.008    | 0.701    |
| MV/BW_m    | 2.248   | 0.349     | 0.187      | 61.160   | 0.701    | 1081.213 |

#### Covariance matrix, Grade 1

|            | Te/Ti_m | PEF/PIF_m | PEF/PIF_sd | MV/BW_sd | Te/Ti_sd | MV/BW_m |
|------------|---------|-----------|------------|----------|----------|---------|
| Te/Ti_m    | 0.069   | -0.014    | -0.002     | 0.096    | 0.019    | -0.284  |
| PEF/PIF_m  | -0.014  | 0.019     | 0.005      | 0.471    | -0.002   | 1.076   |
| PEF/PIF_sd | -0.002  | 0.005     | 0.004      | 0.272    | 0.001    | 0.660   |
| MV/BW_sd   | 0.096   | 0.471     | 0.272      | 68.368   | 0.326    | 99.298  |
| Te/Ti_sd   | 0.019   | -0.002    | 0.001      | 0.326    | 0.011    | 0.077   |
| MV/BW_m    | -0.284  | 1.076     | 0.660      | 99.298   | 0.077    | 995.253 |

#### Covariance matrix, Grade 2

|            | Te/Ti_m | PEF/PIF_m | PEF/PIF_sd | MV/BW_sd | Te/Ti_sd | MV/BW_m  |
|------------|---------|-----------|------------|----------|----------|----------|
| Te/Ti_m    | 0.088   | -0.040    | -0.007     | -0.153   | 0.018    | -2.469   |
| PEF/PIF_m  | -0.040  | 0.133     | 0.031      | 1.219    | -0.005   | 3.923    |
| PEF/PIF_sd | -0.007  | 0.031     | 0.027      | 0.771    | 0.007    | 0.231    |
| MV/BW_sd   | -0.153  | 1.219     | 0.771      | 228.855  | 0.488    | 695.073  |
| Te/Ti_sd   | 0.018   | -0.005    | 0.007      | 0.488    | 0.018    | -0.748   |
| MV/BW_m    | -2.469  | 3.923     | 0.231      | 695.073  | -0.748   | 4289.307 |

#### Covariance matrix, Grade 3

|            | Te/Ti_m | PEF/PIF_m | PEF/PIF_sd | MV/BW_sd | Te/Ti_sd | MV/BW_m  |
|------------|---------|-----------|------------|----------|----------|----------|
| Te/Ti_m    | 0.122   | -0.054    | -0.019     | -2.376   | 0.038    | -9.011   |
| PEF/PIF_m  | -0.054  | 0.259     | 0.028      | -0.167   | -0.041   | 10.185   |
| PEF/PIF_sd | -0.019  | 0.028     | 0.022      | 0.849    | 0.002    | 1.076    |
| MV/BW_sd   | -2.376  | -0.167    | 0.849      | 214.985  | -0.210   | 513.437  |
| Te/Ti_sd   | 0.038   | -0.041    | 0.002      | -0.210   | 0.031    | -4.301   |
| MV/BW_m    | -9.011  | 10.185    | 1.076      | 513.437  | -4.301   | 4567.593 |

## **Model (PD): breed specific model based on 100 pugs.**

Prior probabilities (Grade 0, 1, 2, 3): 0.07, 0.26, 0.5, 0.17

### **Parameter means**

|         | Te/Ti_m | PEF/PIF_m | PEF/PIF_sd | MV/BW_sd | Te/Ti_sd | MV/BW_m |
|---------|---------|-----------|------------|----------|----------|---------|
| Grade 0 | 1.268   | 0.945     | 0.166      | 22.200   | 0.298    | 209.835 |
| Grade 1 | 1.138   | 0.989     | 0.122      | 25.063   | 0.240    | 189.377 |
| Grade 2 | 1.152   | 1.310     | 0.317      | 32.211   | 0.330    | 191.267 |
| Grade 3 | 1.338   | 1.440     | 0.315      | 32.288   | 0.363    | 209.702 |

### **Covariance matrix, Grade 0**

|            | Te/Ti_m | PEF/PIF_m | PEF/PIF_sd | MV/BW_sd | Te/Ti_sd | MV/BW_m |
|------------|---------|-----------|------------|----------|----------|---------|
| Te/Ti_m    | 0.170   | -0.044    | -0.009     | -1.039   | 0.015    | 4.096   |
| PEF/PIF_m  | -0.044  | 0.030     | 0.006      | 1.008    | 0.000    | -1.811  |
| PEF/PIF_sd | -0.009  | 0.006     | 0.004      | 0.366    | 0.001    | -0.182  |
| MV/BW_sd   | -1.039  | 1.008     | 0.366      | 60.964   | 0.122    | -26.953 |
| Te/Ti_sd   | 0.015   | 0.000     | 0.001      | 0.122    | 0.005    | 0.701   |
| MV/BW_m    | 4.096   | -1.811    | -0.182     | -26.953  | 0.701    | 306.191 |

### **Covariance matrix, Grade 1**

|            | Te/Ti_m | PEF/PIF_m | PEF/PIF_sd | MV/BW_sd | Te/Ti_sd | MV/BW_m  |
|------------|---------|-----------|------------|----------|----------|----------|
| Te/Ti_m    | 0.108   | -0.012    | -0.003     | 0.476    | 0.039    | 1.005    |
| PEF/PIF_m  | -0.012  | 0.022     | 0.006      | 0.192    | -0.001   | 1.339    |
| PEF/PIF_sd | -0.003  | 0.006     | 0.003      | 0.085    | 0.000    | 0.308    |
| MV/BW_sd   | 0.476   | 0.192     | 0.085      | 61.662   | 0.393    | 75.789   |
| Te/Ti_sd   | 0.039   | -0.001    | 0.000      | 0.393    | 0.019    | -0.063   |
| MV/BW_m    | 1.005   | 1.339     | 0.308      | 75.789   | -0.063   | 1338.458 |

### **Covariance matrix, Grade 2**

|            | Te/Ti_m | PEF/PIF_m | PEF/PIF_sd | MV/BW_sd | Te/Ti_sd | MV/BW_m  |
|------------|---------|-----------|------------|----------|----------|----------|
| Te/Ti_m    | 0.070   | -0.018    | -0.005     | 0.430    | 0.016    | 1.304    |
| PEF/PIF_m  | -0.018  | 0.149     | 0.028      | 0.935    | -0.011   | 2.969    |
| PEF/PIF_sd | -0.005  | 0.028     | 0.033      | 0.388    | 0.007    | -1.935   |
| MV/BW_sd   | 0.430   | 0.935     | 0.388      | 193.681  | 0.359    | 507.174  |
| Te/Ti_sd   | 0.016   | -0.011    | 0.007      | 0.359    | 0.018    | -1.728   |
| MV/BW_m    | 1.304   | 2.969     | -1.935     | 507.174  | -1.728   | 3260.834 |

### **Covariance matrix, Grade 3**

|            | Te/Ti_m | PEF/PIF_m | PEF/PIF_sd | MV/BW_sd | Te/Ti_sd | MV/BW_m  |
|------------|---------|-----------|------------|----------|----------|----------|
| Te/Ti_m    | 0.083   | -0.008    | -0.004     | -0.103   | 0.032    | -3.992   |
| PEF/PIF_m  | -0.008  | 0.244     | 0.005      | -2.512   | -0.039   | 6.446    |
| PEF/PIF_sd | -0.004  | 0.005     | 0.011      | 0.484    | 0.006    | -0.498   |
| MV/BW_sd   | -0.103  | -2.512    | 0.484      | 181.914  | 0.916    | 269.642  |
| Te/Ti_sd   | 0.032   | -0.039    | 0.006      | 0.916    | 0.030    | -2.713   |
| MV/BW_m    | -3.992  | 6.446     | -0.498     | 269.642  | -2.713   | 3471.749 |

## **Model (FB): breed specific model based on 100 French bulldogs.**

Prior probabilities (Grade 0, 1, 2, 3): 0.1, 0.34, 0.41, 0.15

### **Parameter means**

|         | Te/Ti_m | PEF/PIF_m | PEF/PIF_sd | MV/BW_sd | Te/Ti_sd | MV/BW_m |
|---------|---------|-----------|------------|----------|----------|---------|
| Grade 0 | 0.957   | 1.037     | 0.139      | 26.168   | 0.172    | 212.021 |
| Grade 1 | 1.093   | 0.981     | 0.176      | 26.939   | 0.223    | 215.883 |
| Grade 2 | 1.117   | 1.235     | 0.286      | 38.234   | 0.290    | 235.494 |
| Grade 3 | 0.923   | 1.749     | 0.414      | 45.056   | 0.288    | 268.068 |

### **Covariance matrix, Grade 0**

|            | Te/Ti_m | PEF/PIF_m | PEF/PIF_sd | MV/BW_sd | Te/Ti_sd | MV/BW_m  |
|------------|---------|-----------|------------|----------|----------|----------|
| Te/Ti_m    | 0.028   | -0.016    | -0.003     | -0.650   | 0.003    | 1.112    |
| PEF/PIF_m  | -0.016  | 0.017     | 0.003      | 0.924    | 0.002    | -1.652   |
| PEF/PIF_sd | -0.003  | 0.003     | 0.001      | 0.188    | 0.001    | -0.303   |
| MV/BW_sd   | -0.650  | 0.924     | 0.188      | 115.594  | 0.318    | -180.928 |
| Te/Ti_sd   | 0.003   | 0.002     | 0.001      | 0.318    | 0.003    | -0.585   |
| MV/BW_m    | 1.112   | -1.652    | -0.303     | -180.928 | -0.585   | 714.316  |

### **Covariance matrix, Grade 1**

|            | Te/Ti_m | PEF/PIF_m | PEF/PIF_sd | MV/BW_sd | Te/Ti_sd | MV/BW_m |
|------------|---------|-----------|------------|----------|----------|---------|
| Te/Ti_m    | 0.080   | -0.027    | -0.004     | -0.652   | 0.013    | -2.217  |
| PEF/PIF_m  | -0.027  | 0.023     | 0.006      | 0.625    | -0.006   | 0.209   |
| PEF/PIF_sd | -0.004  | 0.006     | 0.004      | 0.199    | -0.001   | -0.108  |
| MV/BW_sd   | -0.652  | 0.625     | 0.199      | 69.565   | 0.110    | 35.016  |
| Te/Ti_sd   | 0.013   | -0.006    | -0.001     | 0.110    | 0.010    | -0.504  |
| MV/BW_m    | -2.217  | 0.209     | -0.108     | 35.016   | -0.504   | 554.613 |

### **Covariance matrix, Grade 2**

|            | Te/Ti_m | PEF/PIF_m | PEF/PIF_sd | MV/BW_sd | Te/Ti_sd | MV/BW_m  |
|------------|---------|-----------|------------|----------|----------|----------|
| Te/Ti_m    | 0.134   | -0.102    | -0.022     | -1.259   | 0.021    | -7.510   |
| PEF/PIF_m  | -0.102  | 0.143     | 0.035      | 1.869    | -0.015   | 8.751    |
| PEF/PIF_sd | -0.022  | 0.035     | 0.023      | 1.334    | 0.003    | 3.074    |
| MV/BW_sd   | -1.259  | 1.869     | 1.334      | 318.541  | 0.697    | 1071.959 |
| Te/Ti_sd   | 0.021   | -0.015    | 0.003      | 0.697    | 0.019    | 1.342    |
| MV/BW_m    | -7.510  | 8.751     | 3.074      | 1071.959 | 1.342    | 5670.779 |

### **Covariance matrix, Grade 3**

|            | Te/Ti_m | PEF/PIF_m | PEF/PIF_sd | MV/BW_sd | Te/Ti_sd | MV/BW_m  |
|------------|---------|-----------|------------|----------|----------|----------|
| Te/Ti_m    | 0.124   | -0.098    | -0.038     | -3.154   | 0.045    | -6.815   |
| PEF/PIF_m  | -0.098  | 0.345     | 0.041      | 0.693    | -0.079   | 16.927   |
| PEF/PIF_sd | -0.038  | 0.041     | 0.029      | 1.019    | -0.007   | 0.198    |
| MV/BW_sd   | -3.154  | 0.693     | 1.019      | 283.464  | -1.052   | 743.391  |
| Te/Ti_sd   | 0.045   | -0.079    | -0.007     | -1.052   | 0.042    | -5.542   |
| MV/BW_m    | -6.815  | 16.927    | 0.198      | 743.391  | -5.542   | 6261.032 |

## **Model (BD): breed specific model based on 66 bulldogs.**

Prior probabilities (Grade 0, 1, 2, 3): 0.152, 0.409, 0.288, 0.152

### **Parameter means**

|         | Te/Ti_m | PEF/PIF_m | PEF/PIF_sd | MV/BW_sd | Te/Ti_sd | MV/BW_m |
|---------|---------|-----------|------------|----------|----------|---------|
| Grade 0 | 0.982   | 0.905     | 0.117      | 16.250   | 0.174    | 166.484 |
| Grade 1 | 1.024   | 0.900     | 0.086      | 17.027   | 0.160    | 177.952 |
| Grade 2 | 0.968   | 1.036     | 0.179      | 29.004   | 0.207    | 206.779 |
| Grade 3 | 0.958   | 1.354     | 0.254      | 38.943   | 0.218    | 249.443 |

### **Covariance matrix, Grade 0**

|            | Te/Ti_m | PEF/PIF_m | PEF/PIF_sd | MV/BW_sd | Te/Ti_sd | MV/BW_m |
|------------|---------|-----------|------------|----------|----------|---------|
| Te/Ti_m    | 0.030   | -0.011    | 0.002      | 0.096    | 0.010    | -0.251  |
| PEF/PIF_m  | -0.011  | 0.011     | 0.002      | 0.304    | 0.000    | 0.834   |
| PEF/PIF_sd | 0.002   | 0.002     | 0.002      | 0.140    | 0.003    | -0.027  |
| MV/BW_sd   | 0.096   | 0.304     | 0.140      | 32.490   | 0.337    | 112.945 |
| Te/Ti_sd   | 0.010   | 0.000     | 0.003      | 0.337    | 0.010    | 0.690   |
| MV/BW_m    | -0.251  | 0.834     | -0.027     | 112.945  | 0.690    | 808.985 |

### **Covariance matrix, Grade 1**

|            | Te/Ti_m | PEF/PIF_m | PEF/PIF_sd | MV/BW_sd | Te/Ti_sd | MV/BW_m |
|------------|---------|-----------|------------|----------|----------|---------|
| Te/Ti_m    | 0.015   | -0.006    | 0.000      | 0.158    | 0.005    | -0.087  |
| PEF/PIF_m  | -0.006  | 0.007     | 0.000      | 0.033    | -0.002   | 0.511   |
| PEF/PIF_sd | 0.000   | 0.000     | 0.001      | 0.074    | 0.001    | -0.055  |
| MV/BW_sd   | 0.158   | 0.033     | 0.074      | 17.267   | 0.116    | 10.608  |
| Te/Ti_sd   | 0.005   | -0.002    | 0.001      | 0.116    | 0.004    | -0.136  |
| MV/BW_m    | -0.087  | 0.511     | -0.055     | 10.608   | -0.136   | 402.121 |

### **Covariance matrix, Grade 2**

|            | Te/Ti_m | PEF/PIF_m | PEF/PIF_sd | MV/BW_sd | Te/Ti_sd | MV/BW_m  |
|------------|---------|-----------|------------|----------|----------|----------|
| Te/Ti_m    | 0.016   | -0.003    | -0.001     | 0.100    | 0.002    | -0.513   |
| PEF/PIF_m  | -0.003  | 0.024     | 0.006      | 0.008    | 0.004    | -0.511   |
| PEF/PIF_sd | -0.001  | 0.006     | 0.007      | 0.241    | 0.003    | 1.090    |
| MV/BW_sd   | 0.100   | 0.008     | 0.241      | 74.707   | 0.188    | 90.033   |
| Te/Ti_sd   | 0.002   | 0.004     | 0.003      | 0.188    | 0.004    | -0.990   |
| MV/BW_m    | -0.513  | -0.511    | 1.090      | 90.033   | -0.990   | 2030.671 |

### **Covariance matrix, Grade 3**

|            | Te/Ti_m | PEF/PIF_m | PEF/PIF_sd | MV/BW_sd | Te/Ti_sd | MV/BW_m  |
|------------|---------|-----------|------------|----------|----------|----------|
| Te/Ti_m    | 0.031   | -0.005    | -0.003     | -0.934   | 0.003    | 0.047    |
| PEF/PIF_m  | -0.005  | 0.079     | 0.006      | -0.726   | 0.003    | -4.899   |
| PEF/PIF_sd | -0.003  | 0.006     | 0.016      | 0.360    | 0.004    | 1.481    |
| MV/BW_sd   | -0.934  | -0.726    | 0.360      | 70.298   | -0.042   | 36.372   |
| Te/Ti_sd   | 0.003   | 0.003     | 0.004      | -0.042   | 0.006    | -1.131   |
| MV/BW_m    | 0.047   | -4.899    | 1.481      | 36.372   | -1.131   | 1750.422 |
