# Supplementary material for: Whole‐Body Barometric Plethysmography Characterizes Upper Airway Obstruction in 3 Brachycephalic Breeds of Dogs
Source: PubMed Central journal article supplement — J Vet Intern Med. 2016 May 9;30(3):853–65. doi: 10.1111/jvim.13933 (PMC4913582; doi:10.1111/jvim.13933), 2016-05-09
Supplement: JVIM-30-853-s002.pdf [file JVIM-30-853-s002.pdf]

**Supporting Information 2. Classification results of respiratory waveforms in Grade 0 pugs, French bulldogs, and bulldogs using quadratic discriminant analysis (QDA)**

| Dog                                                                                        | Breed          | pp_PD         | pp_FB         | pp_BD         | Classification results |
|--------------------------------------------------------------------------------------------|----------------|---------------|---------------|---------------|------------------------|
| PD1                                                                                        | Pug            | <b>1.0000</b> | 0.0000        | 0.0000        | Pug                    |
| PD2                                                                                        | Pug            | <b>0.9240</b> | 0.0090        | 0.0670        | Pug                    |
| PD3                                                                                        | Pug            | <b>0.6488</b> | 0.3427        | 0.0085        | Pug                    |
| PD4                                                                                        | Pug            | <b>0.8749</b> | 0.0001        | 0.1250        | Pug                    |
| PD5                                                                                        | Pug            | <b>0.9999</b> | 0.0000        | 0.0000        | Pug                    |
| PD6                                                                                        | Pug            | <b>1.0000</b> | 0.0000        | 0.0000        | Pug                    |
| PD7                                                                                        | Pug            | <b>0.9999</b> | 0.0001        | 0.0000        | Pug                    |
| FB1                                                                                        | French bulldog | 0.0024        | <b>0.6432</b> | 0.3545        | French bulldog         |
| FB2                                                                                        | French bulldog | 0.0001        | <b>0.9999</b> | 0.0000        | French bulldog         |
| FB3                                                                                        | French bulldog | 0.1372        | <b>0.8455</b> | 0.0173        | French bulldog         |
| FB4                                                                                        | French bulldog | 0.0000        | <b>1.0000</b> | 0.0000        | French bulldog         |
| FB5                                                                                        | French bulldog | 0.0556        | <b>0.4734</b> | 0.4709        | French bulldog         |
| FB6                                                                                        | French bulldog | 0.0000        | <b>0.9999</b> | 0.0001        | French bulldog         |
| FB7                                                                                        | French bulldog | 0.0000        | <b>0.9959</b> | 0.0041        | French bulldog         |
| FB8                                                                                        | French bulldog | 0.0000        | <b>1.0000</b> | 0.0000        | French bulldog         |
| FB9                                                                                        | French bulldog | 0.0050        | <b>0.9891</b> | 0.0059        | French bulldog         |
| FB10                                                                                       | French bulldog | 0.0000        | <b>1.0000</b> | 0.0000        | French bulldog         |
| BD1                                                                                        | Bulldog        | 0.0000        | 0.0000        | <b>1.0000</b> | Bulldog                |
| BD2                                                                                        | Bulldog        | 0.0000        | 0.0000        | <b>1.0000</b> | Bulldog                |
| BD3                                                                                        | Bulldog        | 0.0000        | 0.0000        | <b>1.0000</b> | Bulldog                |
| BD4                                                                                        | Bulldog        | 0.0005        | 0.0019        | <b>0.9975</b> | Bulldog                |
| BD5                                                                                        | Bulldog        | 0.0188        | 0.0003        | <b>0.9809</b> | Bulldog                |
| BD6                                                                                        | Bulldog        | 0.0939        | 0.0030        | <b>0.9031</b> | Bulldog                |
| BD7                                                                                        | Bulldog        | 0.0034        | 0.0047        | <b>0.9920</b> | Bulldog                |
| BD8                                                                                        | Bulldog        | 0.0000        | 0.0000        | <b>1.0000</b> | Bulldog                |
| BD9                                                                                        | Bulldog        | 0.0000        | 0.3701        | <b>0.6299</b> | Bulldog                |
| BD10                                                                                       | Bulldog        | 0.0000        | 0.0000        | <b>1.0000</b> | Bulldog                |
| pp= posterior probability generated from QDA; PD= pug dog; FB= French bulldog; BD= bulldog |                |               |               |               |                        |
