# Supplementary figures and images for: Whole‐Body Barometric Plethysmography Characterizes Upper Airway Obstruction in 3 Brachycephalic Breeds of Dogs
Source: PubMed Central journal article supplement — J Vet Intern Med. 2016 May 9;30(3):853–65. doi: 10.1111/jvim.13933 (PMC4913582; doi:10.1111/jvim.13933), 2016-05-09

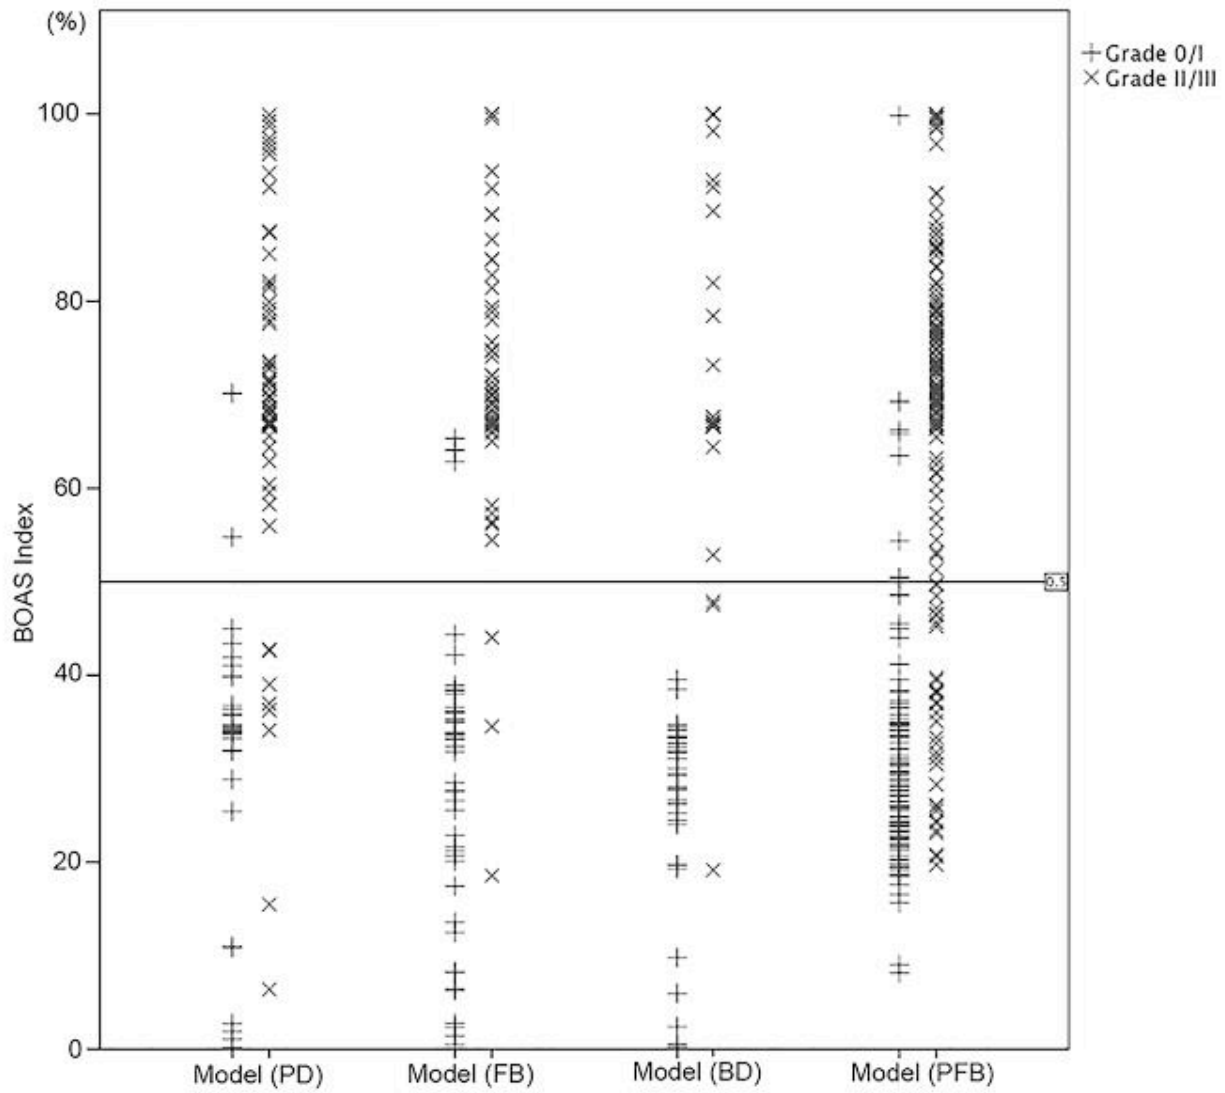

Supplement: JVIM-30-853-s003.pdf [file JVIM-30-853-s003.pdf]
